# Supplementary material for: A rosin-based dielectric polymer with intrinsic low dielectric constant and comprehensively excellent properties
Source: Royal Society of Chemistry journal article supplement (doi:10.1039/d1tc02306c), 2021-01-01
Supplement: d1tc02306c1.pdf [file d1tc02306c1.pdf]

**Rosin-based dielectric polymer with intrinsic low dielectric constant  
and comprehensively excellent properties**

Fei Fu,<sup>ab</sup> Minggu Shen,<sup>\*a</sup> Dan Wang,<sup>a</sup> He Liu,<sup>a</sup> Shibin Shang,<sup>a</sup> Feilong Hu,<sup>c</sup>

Zhanqian Song,<sup>\*a</sup> Jie Song<sup>d</sup>

<sup>a</sup>Institute of Chemical Industry of Forest Products, Chinese Academy of Forestry, Key Laboratory of Biomass Energy and Material, National Engineering Laboratory for Biomass Chemical Utilization, Key and Open Laboratory of Forest Chemical Engineering, State Forestry Administration, Nanjing 210042, Jiangsu Province, China

<sup>b</sup>Co-Innovation Center of Efficient Processing and Utilization of Forest Resources, Nanjing Forestry University, Nanjing 210037, People's Republic of China

<sup>c</sup>Guangxi Key Laboratory of Chemistry and Engineering of Forest Products, Guangxi Collaborative Innovation Center for Chemistry and Engineering of Forest Products, Guangxi University for Nationalities, Nanning 530006, China

<sup>d</sup>Department of Chemistry and Biochemistry, University of Michigan-Flint, Flint, Michigan 48502, United States

\*Corresponding author: Minggu Shen; Zhanqian Song

Email: minguishen@163.com; songzq@hotmail.com

Phone: 086-25-85482452.

Fax: 086-25-85482452.

This electronic supplementary information is composed of the total of 14 pages, including 22 figures.

## Synthesis of Compound 1

Dehydroabiatic acid (0.017 mol, 5.00 g) was dissolved in anhydrous acetonitrile (337 mL), and NBS (0.031 mol, 5.54 g) was added. The mixture was allowed to react in darkness at room temperature for 24 h. The mixture was suction filtered, yielding a white solid that was dissolved in ethyl acetate (50 mL). The solution was subsequently washed with water (50 mL, 3 times) and dried over anhydrous Na<sub>2</sub>SO<sub>4</sub>. After filtration and concentration, Compound 1 was purified using column chromatography with a mixture of petroleum ether and ethyl acetate as the eluent (5:1, v/v). Yield: 53%. <sup>1</sup>H NMR (400 MHz, DMSO) δ 12.20 (s, 1H), 7.36 (s, 1H), 7.00 (s, 1H). <sup>13</sup>C NMR (101 MHz, DMSO) δ 179.2 (m), 149.2 (s), 143.2 (s), 134.5 (s), 128.0 (s), 127.2 (s), 120.8 (m), 46.2 (s), 44.2 (s), 37.5 (s), 36.5 (s), 36.1 (s), 31.9 (s), 28.9 (s), 24.6 (s), 22.7 (s), 22.6 (s), 20.8 (m), 18.0 (s), 16.3 (s); MS (ESI) m/z 377 [M-H]<sup>-</sup>.

## Synthesis of Compound 2

Compound 1 (1.00 mmol, 0.379 g), tripotassium phosphate (2.00 mmol, 0.425 g) and benzocyclobutene-4-boronic acid (1.25 mmol, 0.185 g) were dissolved in a water/ethanol mixture (6 mL, 1:1, v/v) in a N<sub>2</sub> atmosphere. Tetrakis(triphenylphosphine)palladium (0) (0.01 mmol, 0.0116 g) was added, and the mixture was subsequently heated at 60 °C for 10 h. The mixture was allowed to cool to room temperature and suction filtered with diatomite. The organic phases washed with water (50 mL, 3 times), dried over anhydrous Na<sub>2</sub>SO<sub>4</sub>, filtered and concentrated to yield the crude product. Compound 2 was purified using column chromatography with a mixture of petroleum ether and ethyl acetate as the eluent (5:1, v/v). Yield: 85%. <sup>1</sup>H

NMR (400 MHz, DMSO)  $\delta$  12.16 (s, 1H), 7.10 (d,  $J = 7.5$  Hz, 1H), 7.02 (dd,  $J = 7.5$ , 0.9 Hz, 1H), 7.00 (s, 1H), 6.93 (s, 1H), 6.91 (s, 1H), 3.18 (s, 4H).  $^{13}\text{C}$  NMR (101 MHz, DMSO)  $\delta$  179.4 (s), 146.27 (s), 144.9 (s), 143.4 (s), 142.5 (s), 140.6 (s), 138.9 (s), 133.5 (s), 127.7 (s), 125.4 (s), 125.3 (s), 123.2 (s), 122.0 (s), 46.3 (s), 44.6 (s), 37.7 (s), 36.3 (s), 36.2 (s), 29.2 (s), 29.0 (s), 28.9 (s), 28.3 (s), 24.8 (s), 24.2 (s), 24.0 (s), 21.1 (s), 18.1 (s), 16.3 (s); MS (ESI)  $m/z$  401 [M-H] $^-$ .

### Synthesis of Compound 3

Lithium aluminum hydride (68.4 mmol, 2.60 g) and tetrahydrofuran (40 mL) were added to a round bottom flask containing magnetons. A solution of compound **2** (12.4 mmol, 5.00 g) dissolved in tetrahydrofuran (40 mL) was added dropwise at 0 °C. After dripping, stir for 0.5 h, then stir at room temperature for 2 h. At the end of the reaction, deionized water and 10% HCl were added at 0 °C successively to annihilate. The organic phases were washed with water (50 mL, 3 times), dried over anhydrous  $\text{Na}_2\text{SO}_4$ , filtered and concentrated to yield the crude product. Compound **3** was purified using column chromatography with a mixture of petroleum ether and ethyl acetate as the eluent (5:1, v/v). Yield: 92%.  $^1\text{H}$  NMR (400 MHz,  $\text{CDCl}_3$ )  $\delta$  7.09 (dd,  $J = 7.5$ , 1.1 Hz, 1H), 7.06 (d,  $J = 7.4$  Hz, 1H), 7.02 (s, 1H), 7.00 (s, 1H), 6.96 (s, 1H), 3.48 (dd,  $J = 10.9$ , 5.0 Hz, 1H), 3.23 (d,  $J = 11.5$  Hz, 5H).  $^{13}\text{C}$  NMR (101 MHz,  $\text{CDCl}_3$ )  $\delta$  146.88 (s), 145.31 (s), 143.94 (s), 143.09 (s), 141.38 (s), 139.53 (s), 134.08 (s), 128.17 (s), 126.24 (s), 125.69 (s), 123.75 (s), 121.98 (s), 72.28 (s), 43.97 (s), 38.48 (s), 37.92 (s), 37.41 (s), 35.15 (s), 29.96 (s), 29.64 (s), 29.48 (s), 28.94 (s), 25.38 (s), 24.59 (s), 24.36 (s), 18.97 (s), 18.67 (s), 17.46 (s). MS (EI)  $m/z$  388.

### **Preparation of BCB films for the measurement of the surface roughness**

A solution of BCB-DA-Si dissolved in xylene (35 mg/mL) was spin-coated on a monocrystalline silicon wafer to form a smooth film which was dried for 24 h at room temperature. The silicon wafer was heated stepwise at 130 °C for 0.5 h, 180 °C for 1.0 h, 210 °C for 1.0 h, 230 °C for 1.5 h and 250°C for 1.5 h in an argon atmosphere.

A solution of BCB-Si dissolved in xylene (35 mg/mL) was spin-coated on a monocrystalline silicon wafer to form a smooth film which was dried for 24 h at room temperature. The silicon wafer was heated stepwise at 130 °C for 0.5 h, 180 °C for 1.0 h, 210 °C for 1.0 h, 230 °C for 1.5 h and 250°C for 1.5 h in an argon atmosphere.

### **Measurement of crosslinking density of BCB polymers**

The cross-linking density ( $\rho$ ) of a thermoset polymer may be estimated from its elastic modulus in the rubbery region by using the following eq (1):<sup>1</sup>

$$\rho = \frac{E'}{3\Phi RT} \quad (1)$$

where  $\rho$  is the number of moles of network chains per unit volume of the cured polymer,  $\Phi$  is the front factor and equals to 1,  $E'$  is the storage modulus of the polymer at the  $T_g + 40$  °C, and  $R$  and  $T$  are the gas constant and the absolute temperature, respectively. The cross-linking density of P-BCB-DA-Si and P-BCB-Si are 629.65 mol/m<sup>3</sup> and 1480.89 mol/m<sup>3</sup>, respectively. The crosslinking density of P-BCB-DA-Si is smaller than that of P-BCB-Si, because the huge hydrogenated phenanthrene ring hinders the crosslinking of the polymer.

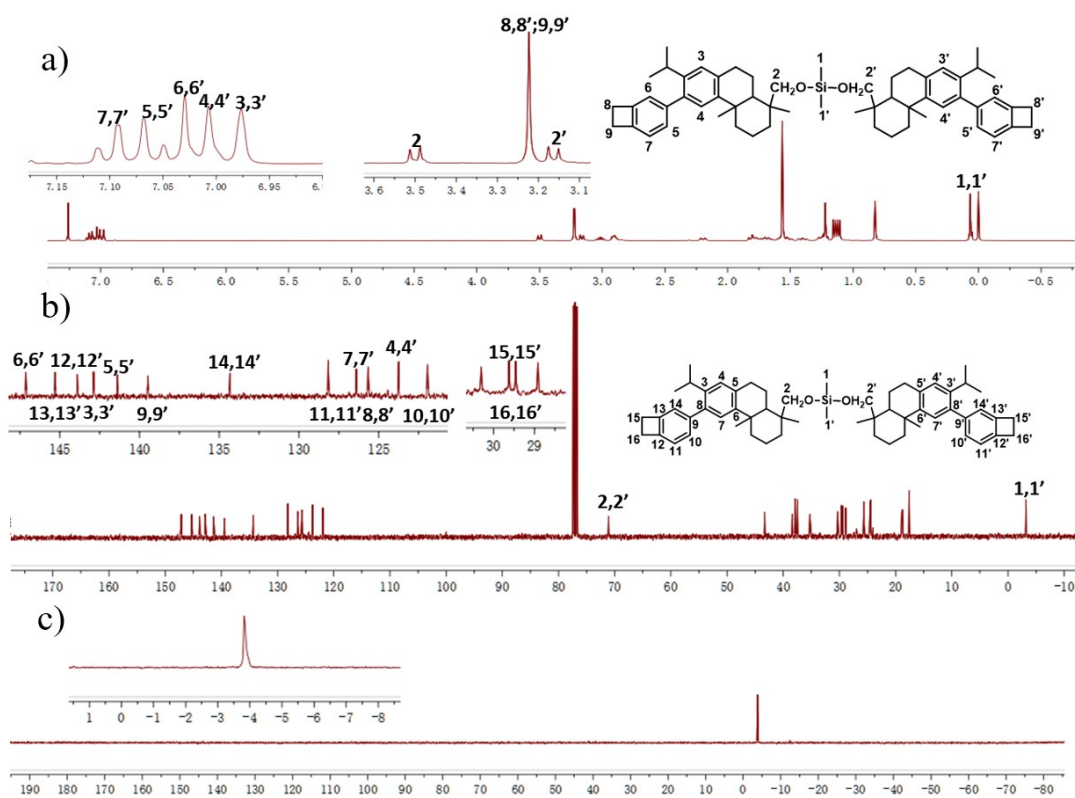

Fig. S1 a)  $^1\text{H}$ , b)  $^{13}\text{C}$ , and c)  $^{29}\text{Si}$  NMR spectra of BCB-DA-Si.

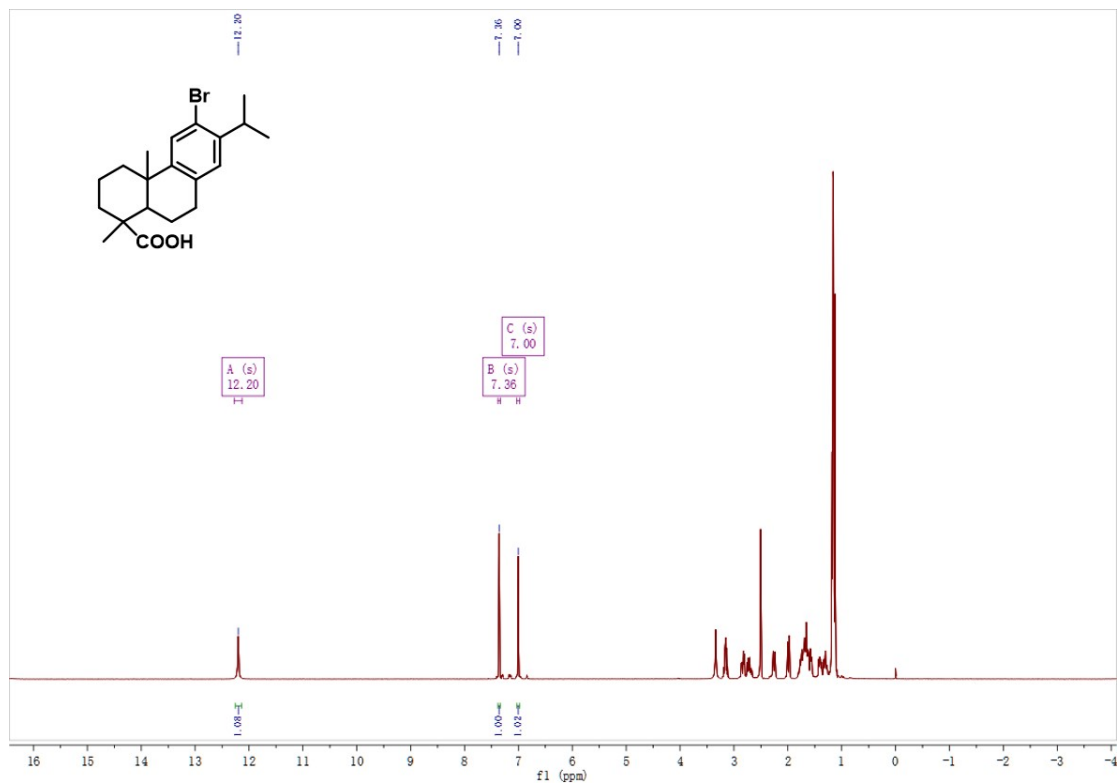

Fig. S2  $^1\text{H}$  NMR spectrum of Compound 1.

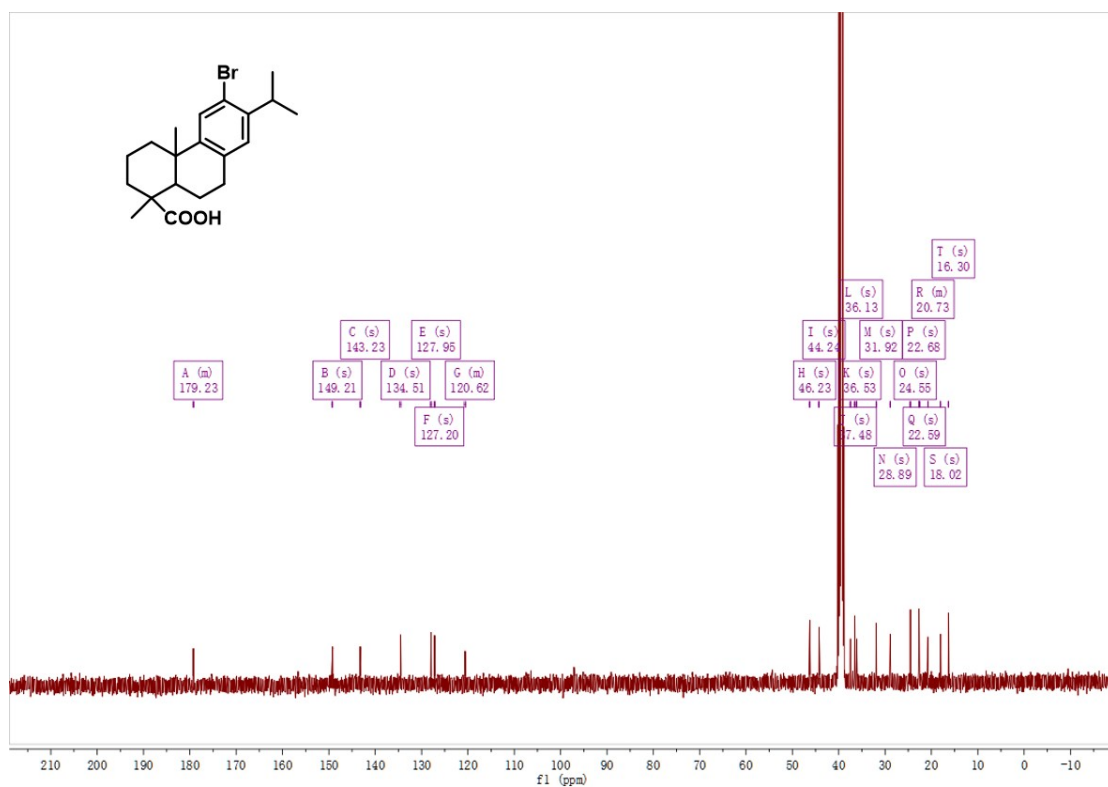

**Fig. S3**  $^{13}\text{C}$  NMR spectrum of Compound 1.

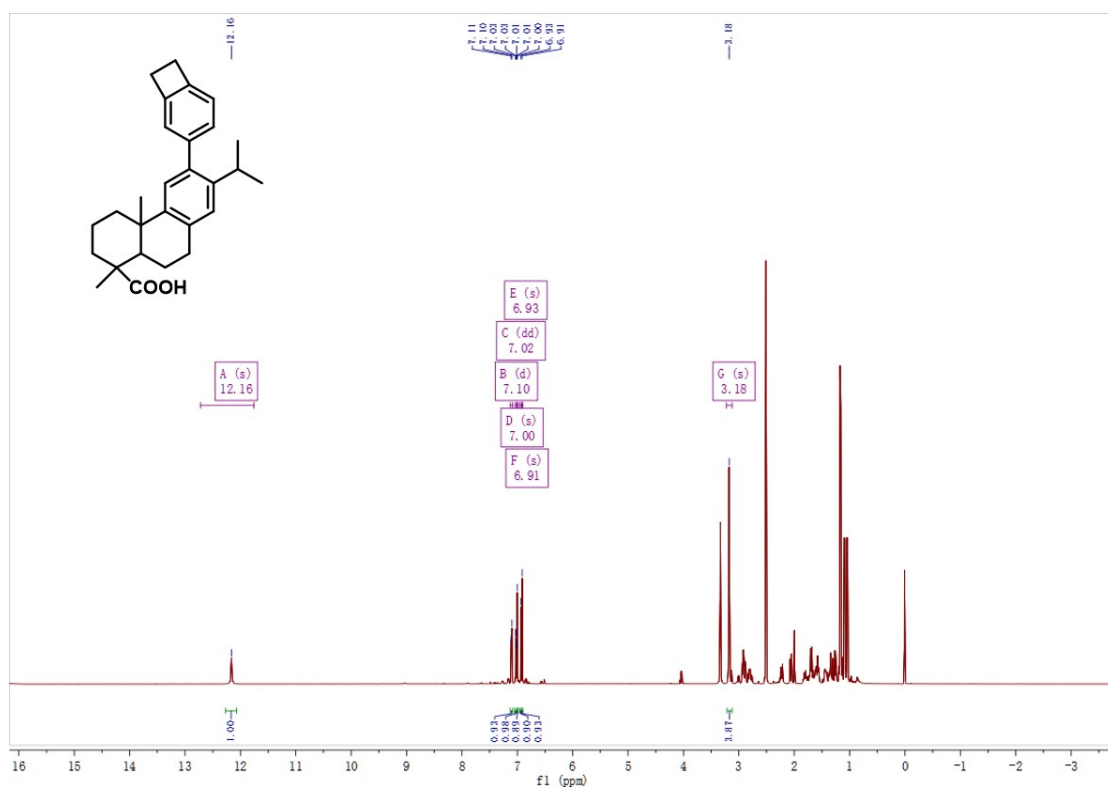

**Fig. S4**  $^1\text{H}$  NMR spectrum of Compound 2.

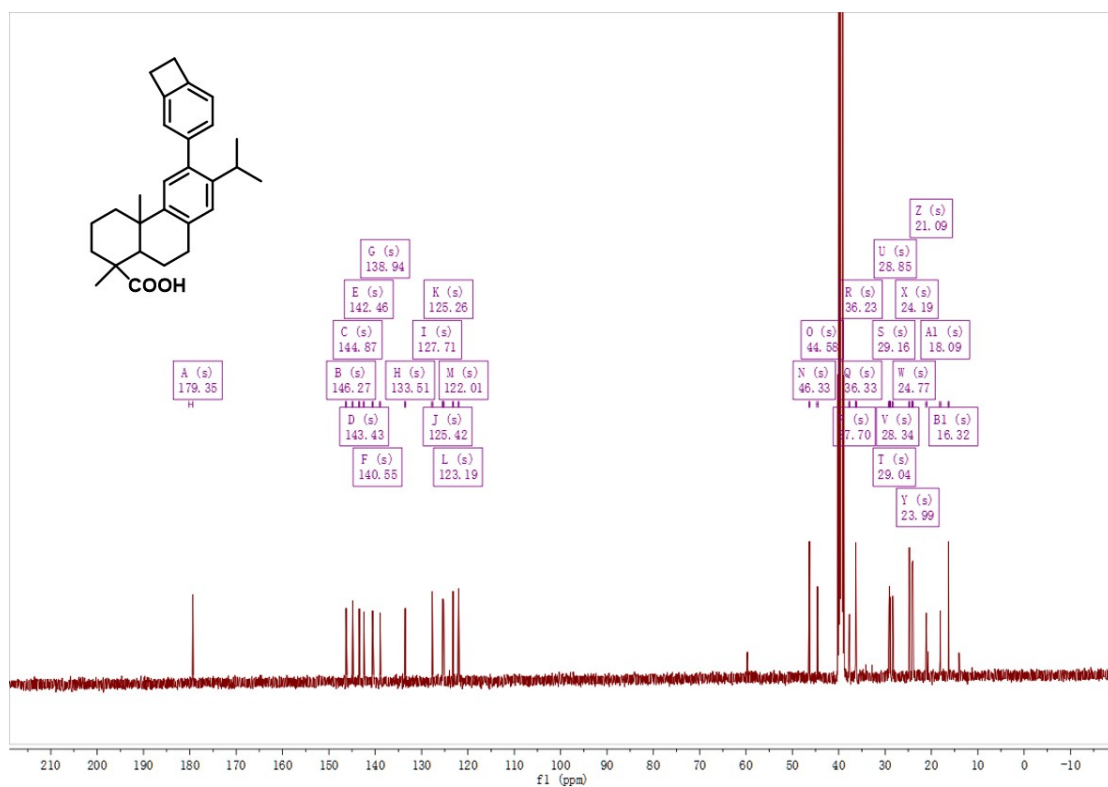

Fig. S5  $^{13}\text{C}$  NMR spectrum of Compound 2.

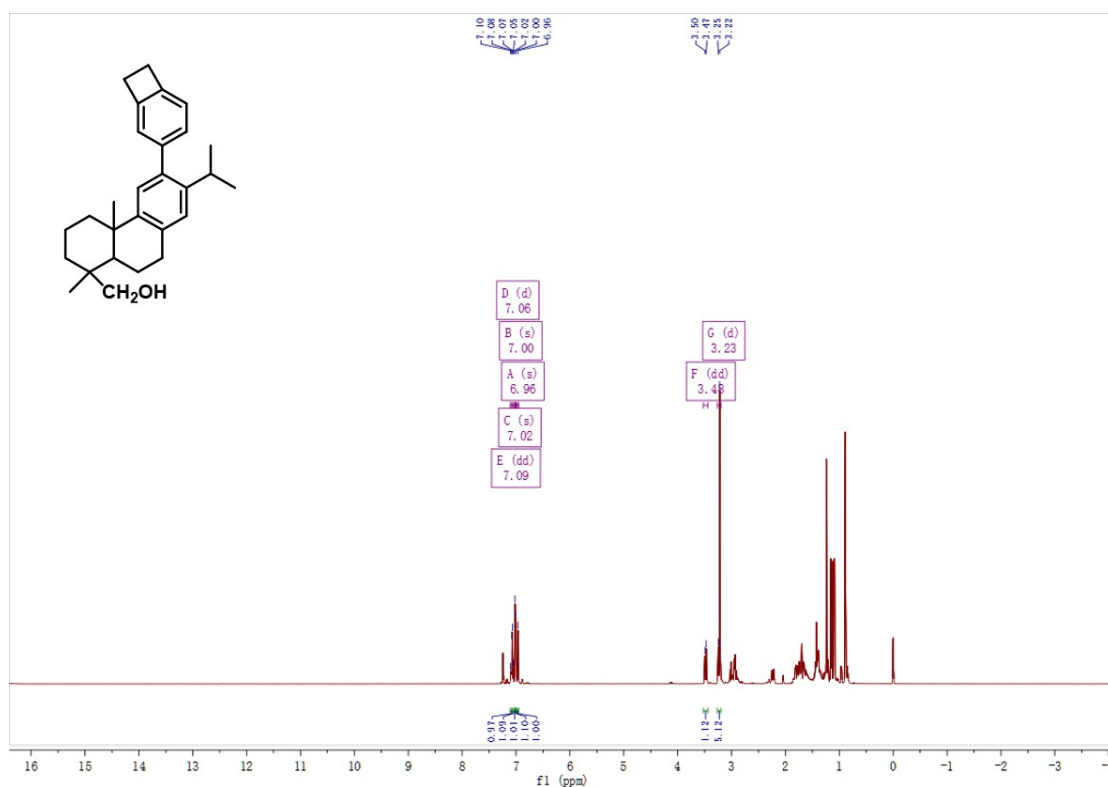

Fig. S6  $^1\text{H}$  NMR spectrum of Compound 3.

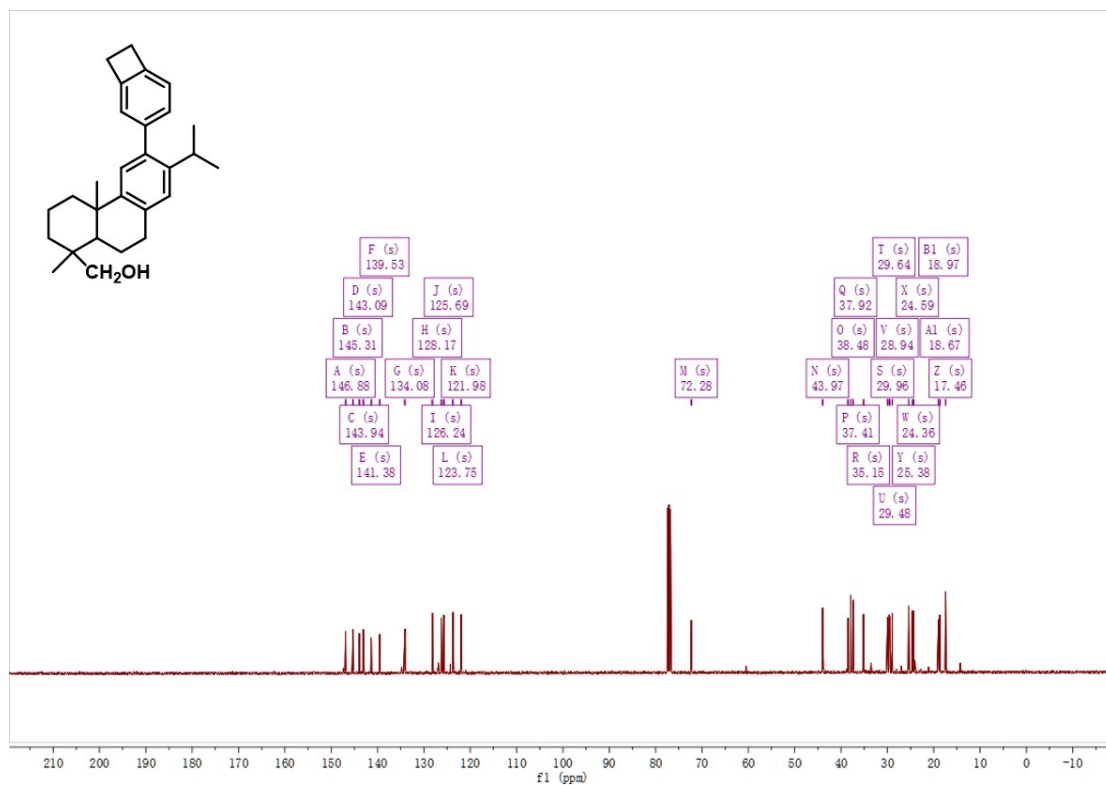

Fig. S7  $^{13}\text{C}$  NMR spectrum of Compound 3.

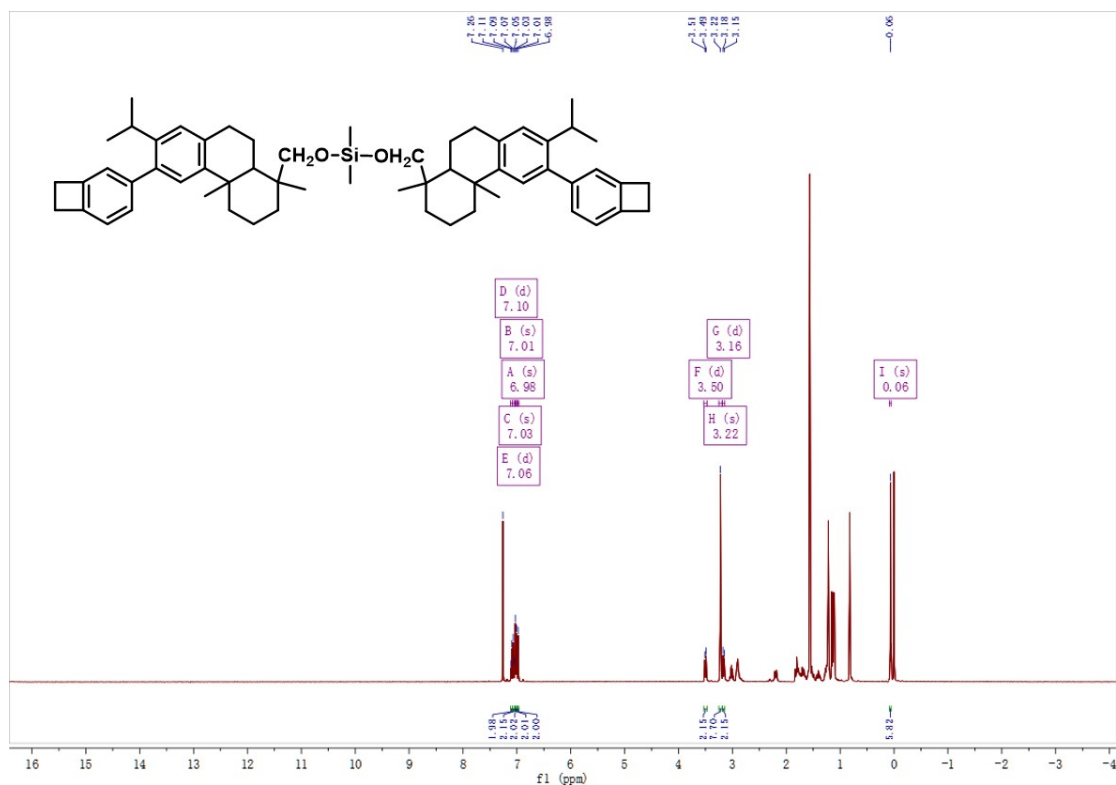

Fig. S8  $^1\text{H}$  NMR spectrum of BCB-DA-Si.



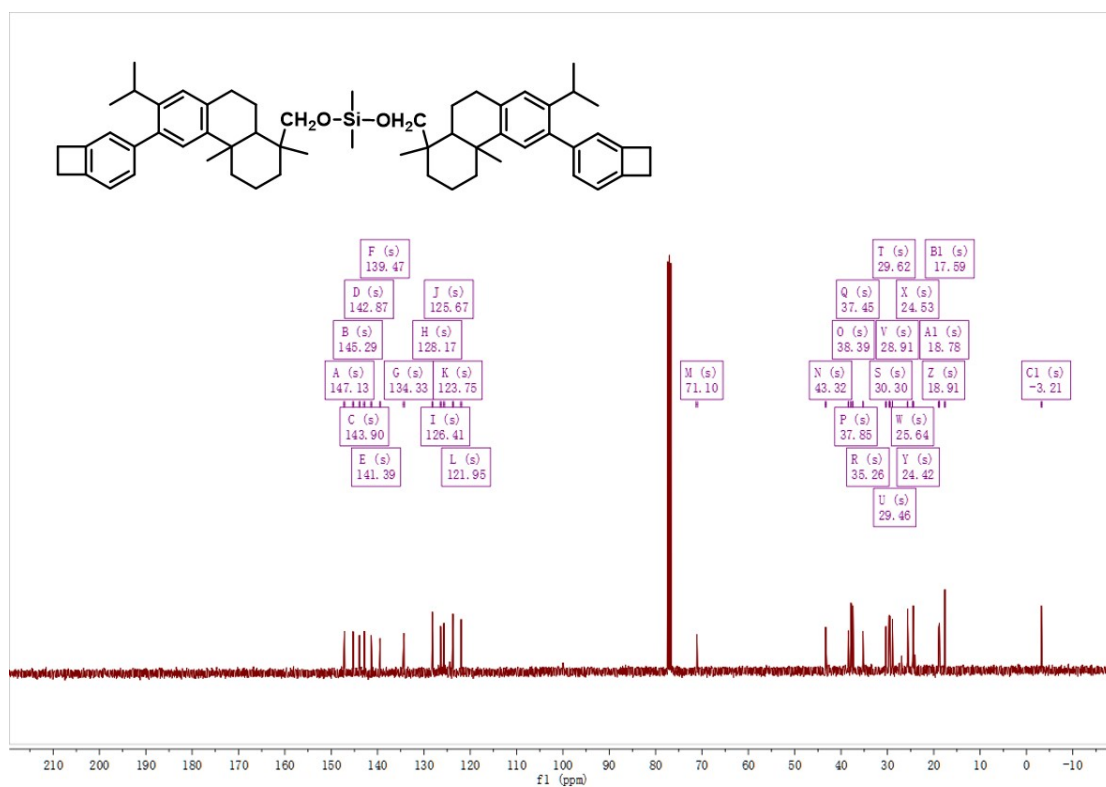

Fig. S9  $^{13}\text{C}$  NMR spectrum of BCB-DA-Si.

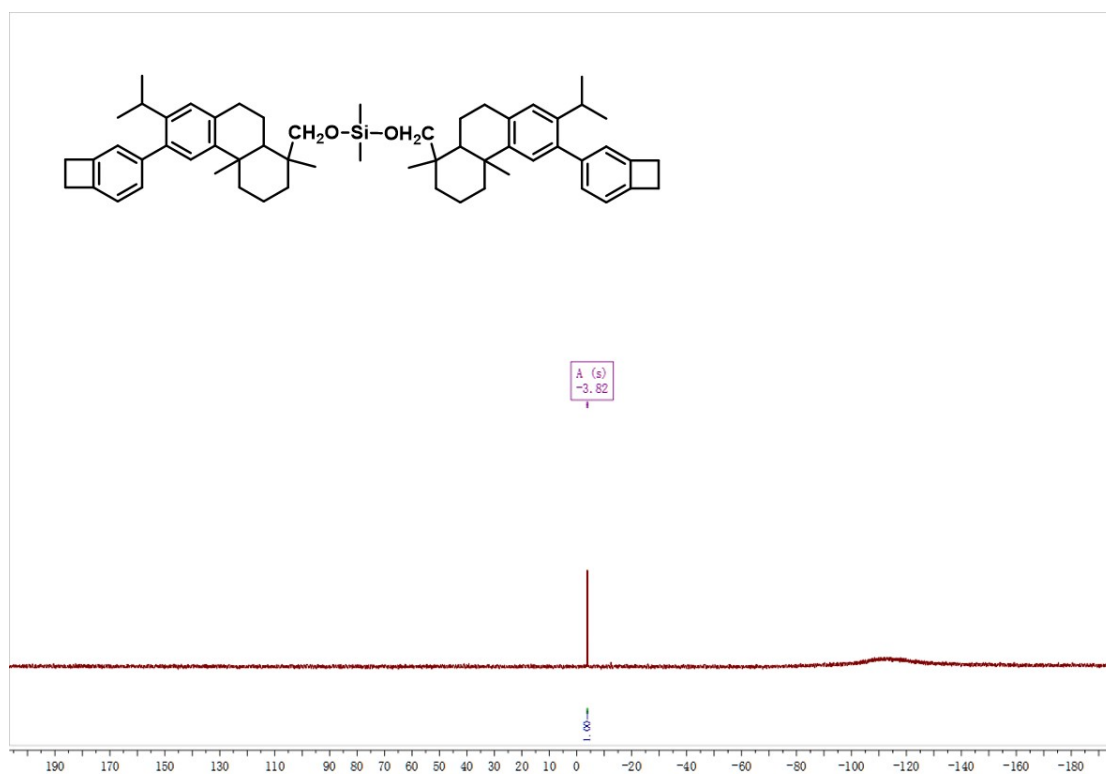

Fig. S10  $^{29}\text{Si}$  NMR spectrum of BCB-DA-Si.

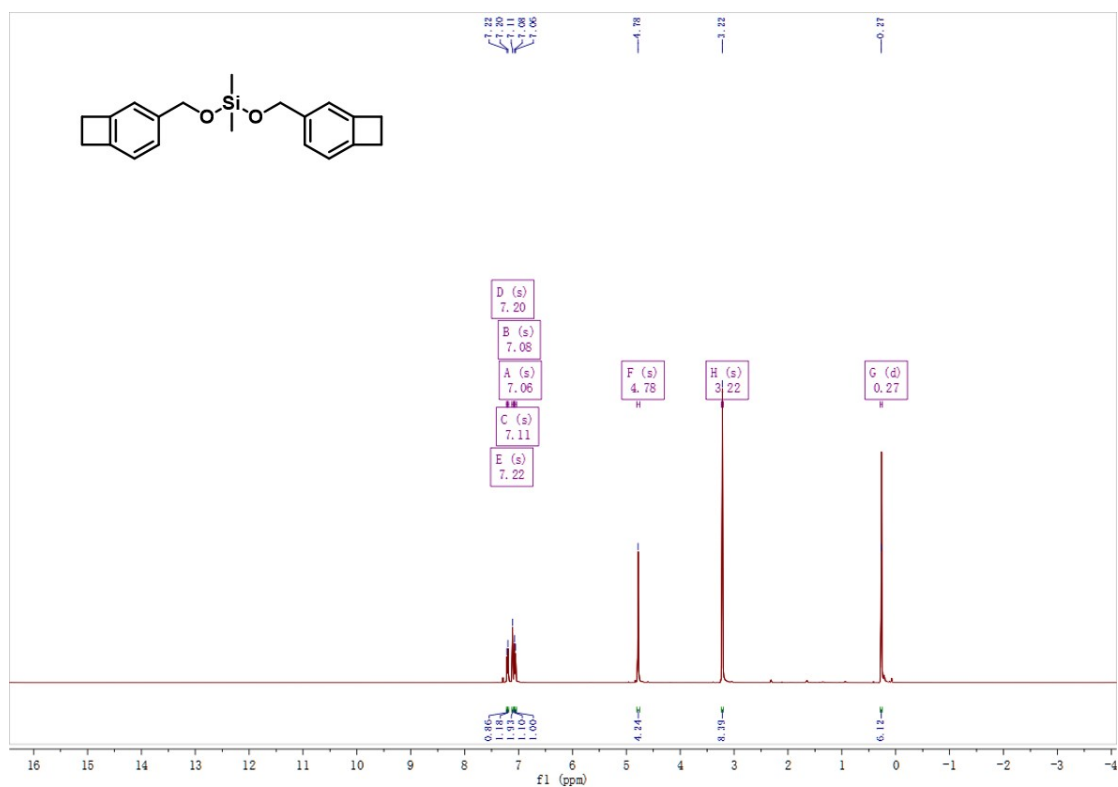

**Fig. S11**  $^1\text{H}$  NMR spectrum of BCB-Si.

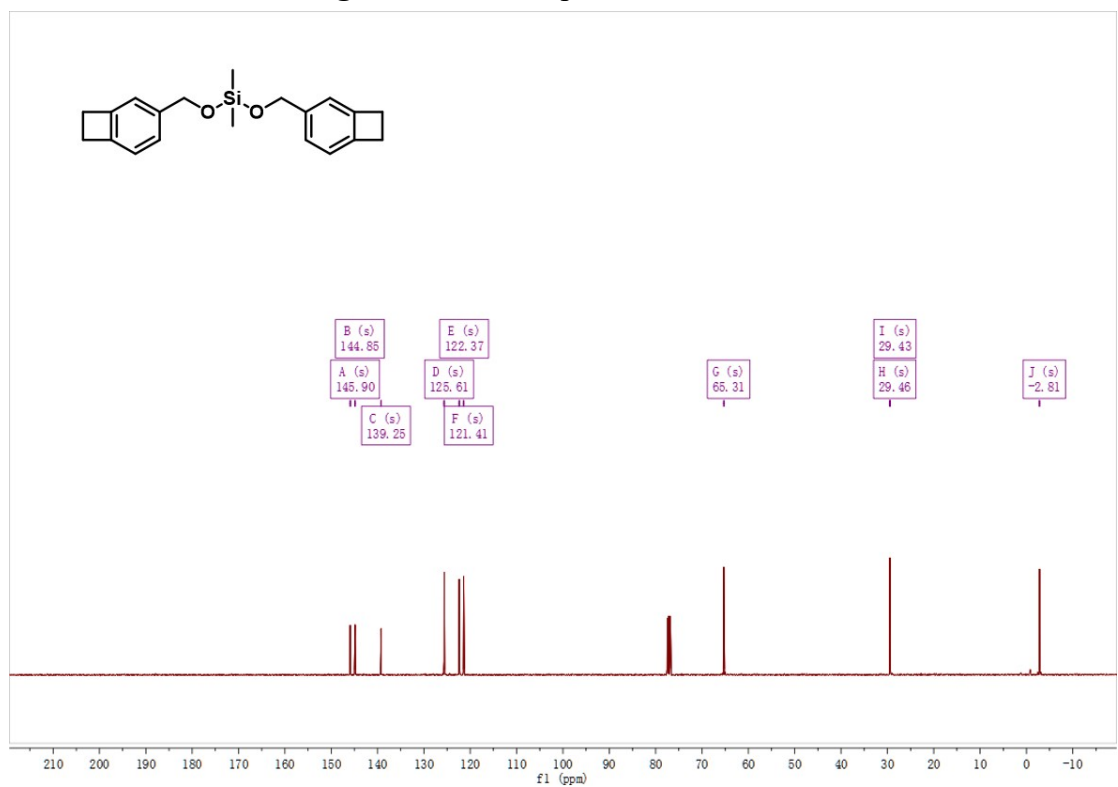

**Fig. S12**  $^{13}\text{C}$  NMR spectrum of BCB-Si.

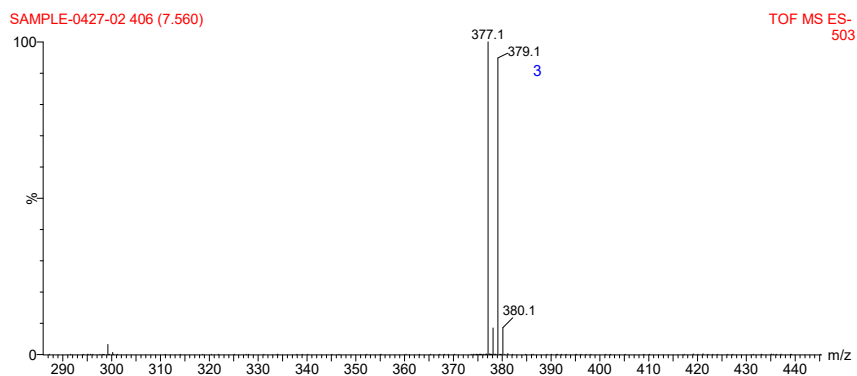

**Fig. S13** MS spectrum of Compound 1.

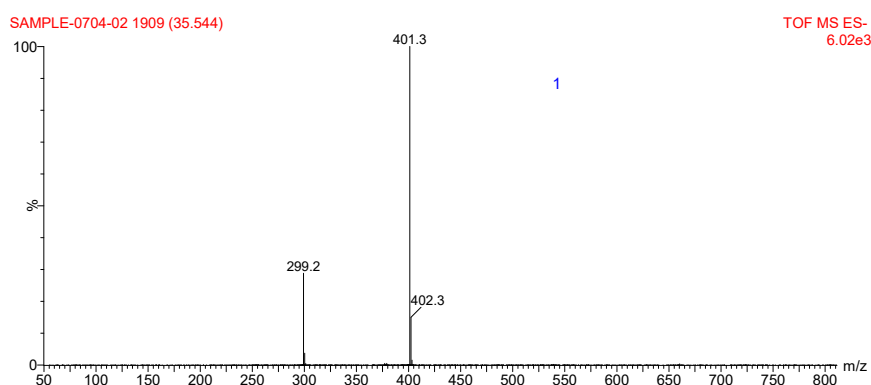

**Fig. S14** MS spectrum of Compound 2.

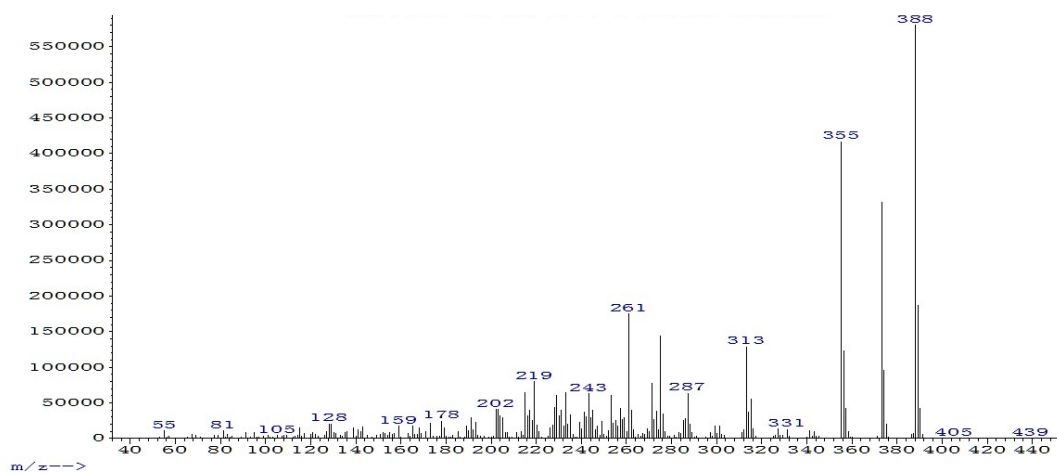

**Fig. S15** MS spectrum of Compound 3.

FF4 #38 RT: 0.20 AV: 1 NL: 1.14E5  
T: FTMS + p NSI Full ms [500.0000-2000.0000]

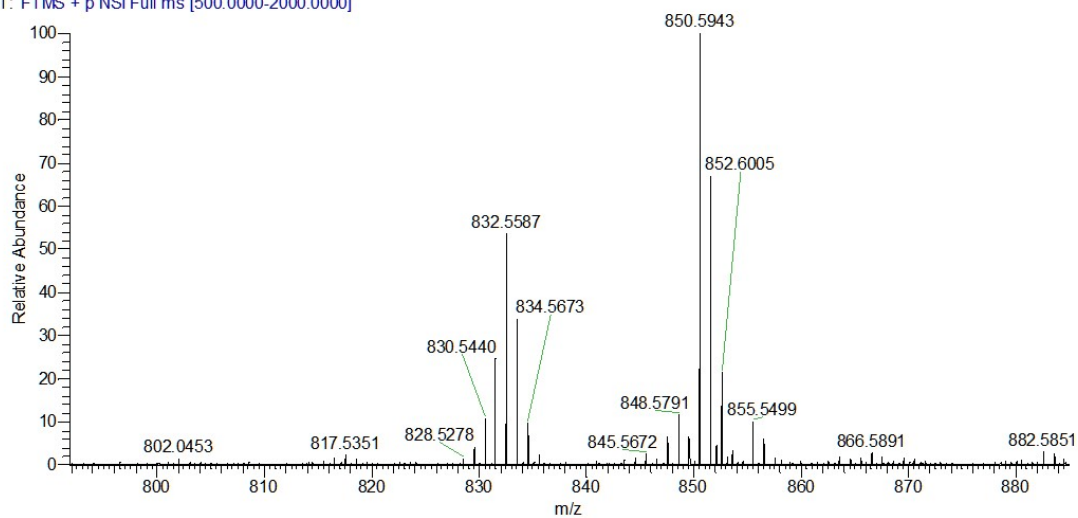

**Fig. S16** MS spectrum of BCB-DA-Si.

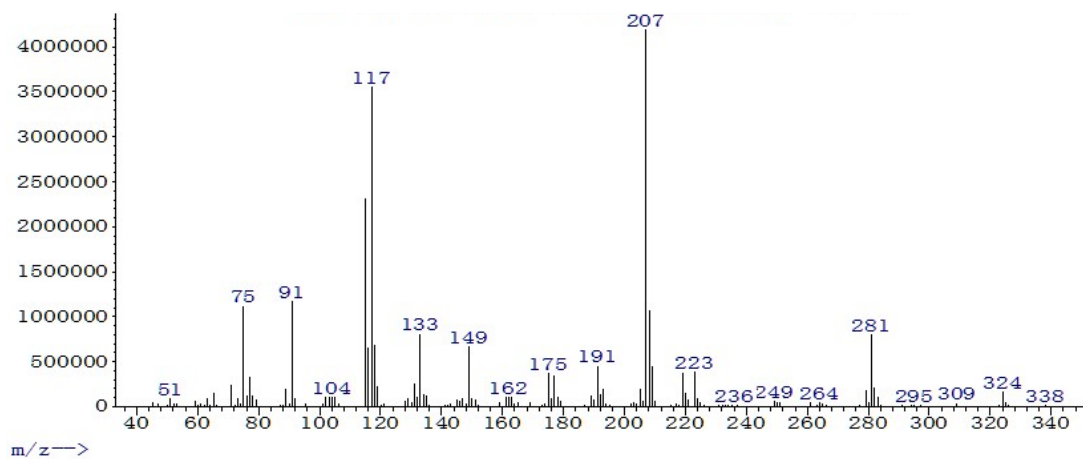

**Fig. S17** MS spectrum of BCB-Si.

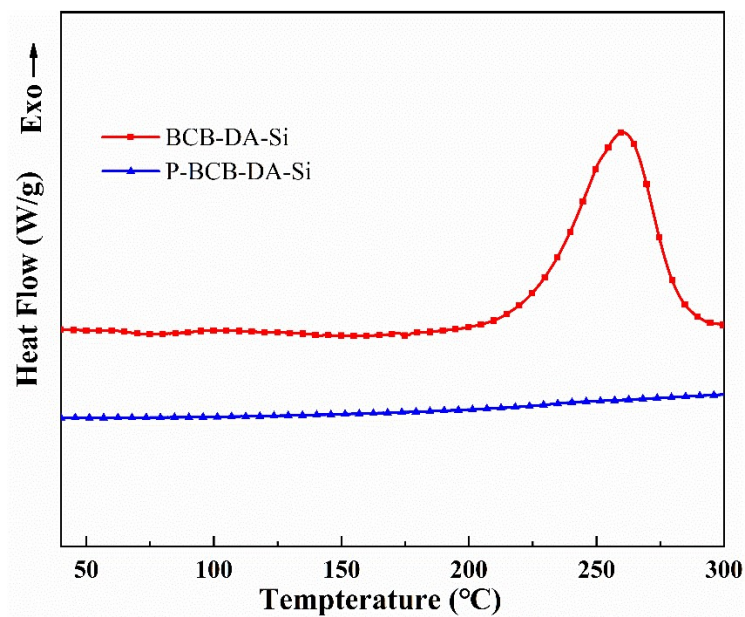

Fig. S18 DSC curves of BCB-DA-Si and P-BCB-DA-Si.

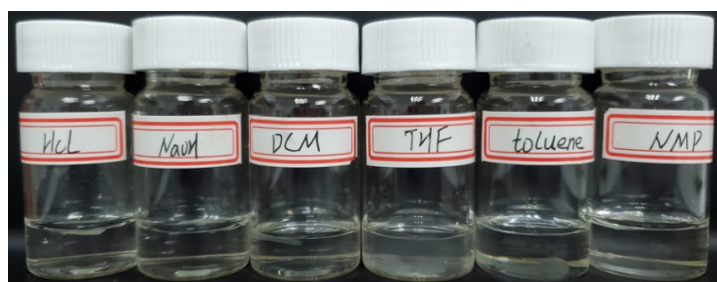

Fig. S19 Solvent resistance of P-BCB-DA-Si.

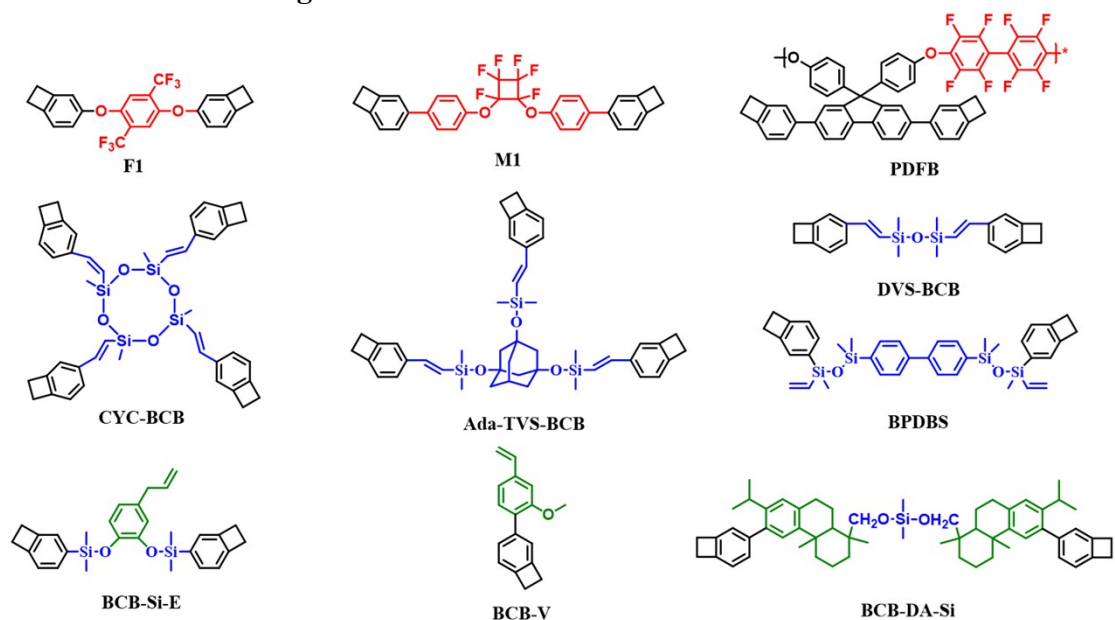

Fig. S20 The structures of reported BCB monomers.

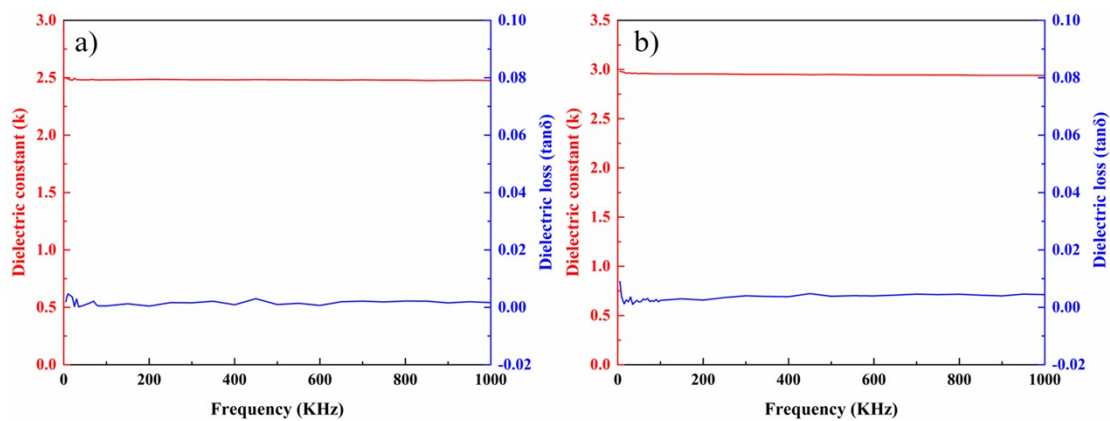

**Fig. S21** Dielectric properties of BCB resins at frequencies ranging from 5 to 1000 KHz. a) P-BCB-DA-Si; b) P-BCB-Si.

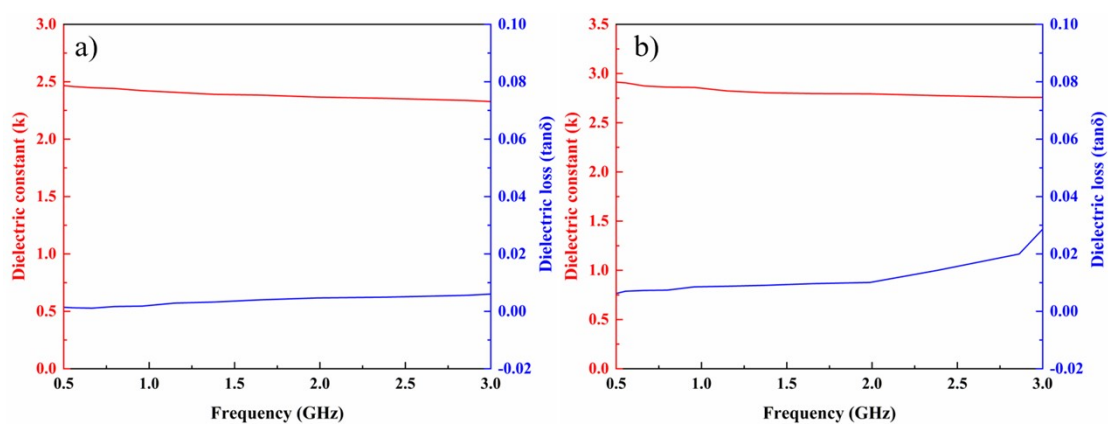

**Fig. S22** Dielectric properties of BCB resins at frequencies ranging from 0.5 to 3.0 GHz. a) P-BCB-DA-Si; b) P-BCB-Si.

## Notes and references

1. J. Chen, M. Zeng, Z. Feng, T. Pang, Y. Huang and Q. Xu, *ACS Appl. Polym. Mater.*, 2019, **1**, 625-630.
